# Supplementary material
Source: HighWire-hosted journal article supplement (https://gh.bmj.com/content/8/5/e012049)
Supplement: inline-supplementary-material-2 [file inline-supplementary-material-2.pdf]

## Appendix – Equipment &amp; Supplies

Appendix Table 1: Operating room and intensive care unit essential equipment checklist

| Level         | Operating Room                                                                                                                                                                                                                                                                                                                                                                                                                                                                                                                                                                                                                                                                                                                                                                                                                                                                                                                                           | Intensive Care Unit (ICU)                                                                                                                                                                                                                                                                                                                                                                                                                                                                                                                                                                                                                                               | Other                                                                                                                                                                                                                                                                                                                                                                                                                                                                                                                                                                                                                                                                                                                                                                                                                                                                                                            |
|---------------|----------------------------------------------------------------------------------------------------------------------------------------------------------------------------------------------------------------------------------------------------------------------------------------------------------------------------------------------------------------------------------------------------------------------------------------------------------------------------------------------------------------------------------------------------------------------------------------------------------------------------------------------------------------------------------------------------------------------------------------------------------------------------------------------------------------------------------------------------------------------------------------------------------------------------------------------------------|-------------------------------------------------------------------------------------------------------------------------------------------------------------------------------------------------------------------------------------------------------------------------------------------------------------------------------------------------------------------------------------------------------------------------------------------------------------------------------------------------------------------------------------------------------------------------------------------------------------------------------------------------------------------------|------------------------------------------------------------------------------------------------------------------------------------------------------------------------------------------------------------------------------------------------------------------------------------------------------------------------------------------------------------------------------------------------------------------------------------------------------------------------------------------------------------------------------------------------------------------------------------------------------------------------------------------------------------------------------------------------------------------------------------------------------------------------------------------------------------------------------------------------------------------------------------------------------------------|
| PCCSL-4,<br>5 | <ul style="list-style-type: none"> <li>Anesthesia delivery system</li> <li><b>Anesthesia cart</b></li> <li><b>Anesthesia circuits</b></li> <li>Anesthetic patient monitors complete with accessories for invasive and non-invasive SpO<sub>2</sub>, end tidal CO<sub>2</sub>, blood pressure measurement, ECG, Temperature,</li> <li><b>Patient stirrups</b></li> <li><b>Patient pillows</b></li> <li><b>Patient positioners</b></li> <li>Ceiling mounted dual operating light</li> <li>Operating table with accessories for cardiothoracic surgery</li> <li>Laminar flow system (preferable)</li> <li>High Frequency Electrosurgical unit</li> <li>Surgical suction machine</li> <li>Heart – Lung Machine</li> <li>Cell Saver</li> <li>Auto log autotransfusion system</li> <li>Automated coagulation system</li> <li>Complete set of surgical instruments for adult and congenital cardiac surgery</li> <li>Kick bucket</li> <li>Mayo table</li> </ul> | <ul style="list-style-type: none"> <li>ICU beds</li> <li>Pendants for ICU</li> <li>Bedside locker</li> <li>Overbed table</li> <li>Intensive care ventilator</li> <li>Syringe infusion pump</li> <li>Volumetric infusion pump</li> <li>Oxygen flowmeter multi-parameter patient monitor with SpO<sub>2</sub>, NIBP, IBP, Respiration, ECG, Temperature</li> <li>Equipment in the pool for all beds</li> <li>Multi-view workstation</li> <li>Ultrasound system</li> <li>Defibrillator</li> <li>Mobile examination lamp</li> <li>Medicine trolley</li> <li>Acute Dialysis machine</li> <li>Nurse call system</li> <li>Vacuum extractor</li> <li>Nurse's station</li> </ul> | <p><b>INFECTION CONTROL</b><br/> <b>Laundry:</b> Medical grade washing machine, Dryer system, Flat ironer</p> <p><b>CSSD – CENTRAL STERILISATION SUPPLY DEPARTMENT</b><br/> <b>Dirty Area</b></p> <ul style="list-style-type: none"> <li>Automatic washer disinfectant</li> <li>Scrub sinks</li> <li>Ultrasonic cleaner</li> <li>Loading trolley</li> </ul> <p><b>Clean Area</b></p> <ul style="list-style-type: none"> <li>High Pressure Steam sterilizer</li> <li>Low temperature sterilizer</li> <li>Loading/unloading trolley</li> <li>Spray gun</li> <li>Sealing machine</li> </ul> <p><b>Sterile Area</b></p> <ul style="list-style-type: none"> <li>Stainless steel shelves</li> </ul> <p><b>MEDICAL GAS SYSTEM</b><br/> Oxygen plant with flow rate of 8 Nm<sup>3</sup>/h complete with a cylinder booster station<br/> Compressed air plant complete with accessories<br/> Estimate for medical gas</p> |

|                |                                                                                                                                                                                                                                                                                                                                                                                                                                                                                                              |                                                                                  |  |
|----------------|--------------------------------------------------------------------------------------------------------------------------------------------------------------------------------------------------------------------------------------------------------------------------------------------------------------------------------------------------------------------------------------------------------------------------------------------------------------------------------------------------------------|----------------------------------------------------------------------------------|--|
|                | <ul style="list-style-type: none"> <li>• Bowl stand</li> <li>• Defibrillator complete with all accessories</li> <li>• Heater –cooler unit</li> <li>• Instrument cabinet</li> <li>• Ice machine</li> <li>• Scrub station</li> <li>• Syringe infusion pump</li> <li>• Volumetric infusion pump</li> <li>• Syringe and needle dispenser</li> </ul>                                                                                                                                                              |                                                                                  |  |
|                | <ul style="list-style-type: none"> <li>• Smoke evacuation unit</li> <li>• Surgeon's stool (with wheels)</li> <li>• Ceiling mounted pendants with socket outlets for medical oxygen, CO2 and compressed air connections, electrical power supply for all equipment, perfusion, Infusion</li> <li>• Stand Instrument table</li> <li>• Intra-aortic balloon pump</li> <li>• CONSUMABLES – Sutures, nasal cannula, gloves, syringes, etc.</li> <li>• Table-top autoclave</li> <li>• Patient stretcher</li> </ul> |                                                                                  |  |
| <b>PCCSL-5</b> | <ul style="list-style-type: none"> <li>• ECMO machine (preferable)</li> </ul>                                                                                                                                                                                                                                                                                                                                                                                                                                | <ul style="list-style-type: none"> <li>• NIRS monitoring (preferable)</li> </ul> |  |

**Appendix Table 2: Outpatient essential equipment and supplies checklist**

| Level             | Outpatient Department                                                                                                                                                                                                                                                            |
|-------------------|----------------------------------------------------------------------------------------------------------------------------------------------------------------------------------------------------------------------------------------------------------------------------------|
| <b>PCCSL-1</b>    | <ul style="list-style-type: none"> <li>• Pulse Oximeter</li> <li>• Stethoscope</li> <li>• Manual or Digital Blood Pressure unit (with pressure-cuff age/weight appropriate)</li> <li>• Low cost telemedicine platforms (preferable).</li> </ul>                                  |
| <b>PCCSL-2, 3</b> | <p>All of the above and</p> <ul style="list-style-type: none"> <li>• Echocardiography machine</li> <li>• Telemedicine devices &amp; platform for echocardiography</li> <li>• Consulting room set up for monthly visiting cardiologist visits</li> <li>• Defibrillator</li> </ul> |
| <b>PCCSL-4, 5</b> | <p>All of above and</p> <ul style="list-style-type: none"> <li>• Pacemaker interrogation device</li> <li>• Cardiopulmonary testing (bicycle and/or treadmill)</li> </ul>                                                                                                         |

**Appendix Table 3: Clinical laboratory essential equipment and supplies checklist**

| Level          | Clinical Laboratory                                                                                                                                                                                                                                                                                                                                                                                                                                                                                                                                                                                                                                                                                                                                                                                                                                                                                                                                                        |
|----------------|----------------------------------------------------------------------------------------------------------------------------------------------------------------------------------------------------------------------------------------------------------------------------------------------------------------------------------------------------------------------------------------------------------------------------------------------------------------------------------------------------------------------------------------------------------------------------------------------------------------------------------------------------------------------------------------------------------------------------------------------------------------------------------------------------------------------------------------------------------------------------------------------------------------------------------------------------------------------------|
| PCCSL- 3, 4, 5 | Fully equipped multi-purpose clinical laboratory <ul style="list-style-type: none"> <li>• Clinical chemistry analyzer 5-part differential</li> <li>• Hematology analyzer 3-part differential</li> <li>• Hematology analyzer</li> <li>• Blood Gas analyzer</li> <li>• Electrolyte analyzer</li> <li>• Universal oven</li> <li>• Water distilling plant</li> <li>• Universal Centrifuge</li> <li>• Binocular/Trinocular microscopes</li> <li>• Precision balance</li> <li>• Analytical balance</li> <li>• Laboratory balance</li> <li>• pH meter</li> <li>• Water bath</li> <li>• Laboratory refrigerator</li> <li>• Blood Bank Refrigerator</li> <li>• Phlebotomy chairs</li> <li>• Laboratory workbench</li> <li>• Rotator/shaker for micropipettes</li> <li>• Electrophoresis system</li> <li>• Laboratory incubator</li> <li>• Differential counter</li> <li>• Orbital shaker</li> <li>• Hematocrit centrifuge</li> <li>• Plasma freezer</li> <li>• Hot plate</li> </ul> |
